# Supplementary material for: Marine Biofilm Bacteria Evade Eukaryotic Predation by Targeted Chemical Defense
Source: PLOS journal article supplement (doi:10.1371/journal.pone.0002744), 2008-07-22
Supplement: S3 (10.1371/journal.pone.0002744.s003) [file journal.pone.0002744.s003]

**Table S3.** Survival of *R. nasuta*, *Tetrahymena* sp. and *A. castellanii* on violacein-producing biofilms of *P. tunicata*, *P. ulvae*, *P. luteoviolacea*, and *Microbulbifer* sp. LT<sub>50</sub> values were used to describe the time needed to kill 50% of the initial predator population. Each value represents the mean  $\pm$  SD of four replicates.

| Bacterial species        | LT <sub>50</sub> of <i>R. nasuta</i><br>(hours) | LT <sub>50</sub> of <i>Tetrahymena</i> sp.<br>(hours) | LT <sub>50</sub> of <i>A. castellanii</i><br>(hours) |
|--------------------------|-------------------------------------------------|-------------------------------------------------------|------------------------------------------------------|
| <i>P. tunicata</i>       | 6 $\pm$ 1.0                                     | 9 $\pm$ 1.8                                           | 8 $\pm$ 1.2                                          |
| <i>P. ulvae</i>          | 15 $\pm$ 1.4                                    | 18 $\pm$ 2.6                                          | 17 $\pm$ 1.3                                         |
| <i>P. luteoviolacea</i>  | 11 $\pm$ 1.3                                    | 15 $\pm$ 2.2                                          | 14 $\pm$ 1.2                                         |
| <i>Microbulbifer</i> sp. | 2 $\pm$ 0.6                                     | 5 $\pm$ 0.8                                           | 2 $\pm$ 0.9                                          |
